# Supplementary material for: Lipophilic Cations Rescue the Growth of Yeast under the Conditions of Glycolysis Overflow
Source: MDPI journal article supplement (doi:10.3390/biom10091345), 2020-09-20
Supplement: s1 [file s1]

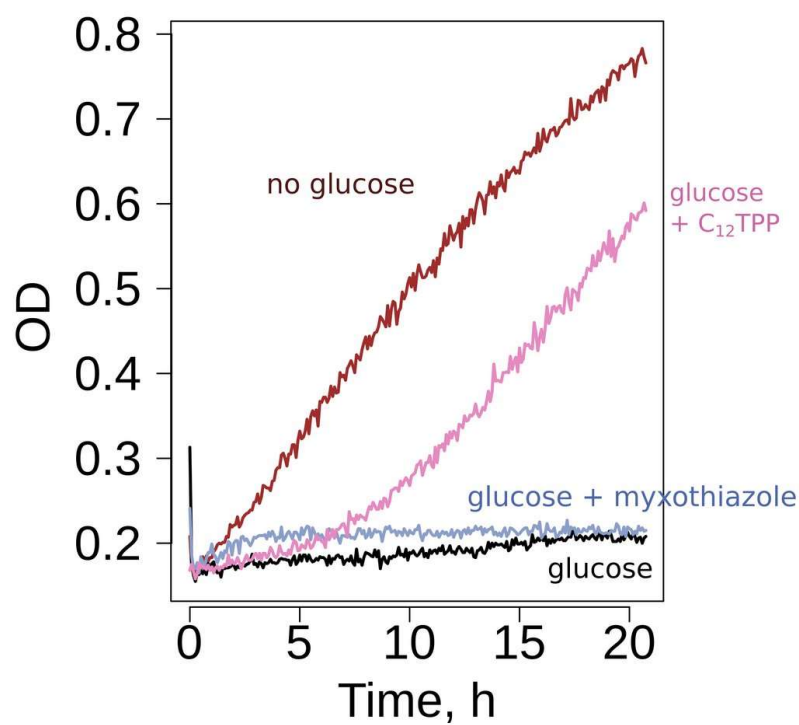

Figure S1. C<sub>12</sub>TPP addition led to a higher final cell density than the addition of myxothiazol in glucose-containing YPetOH media.

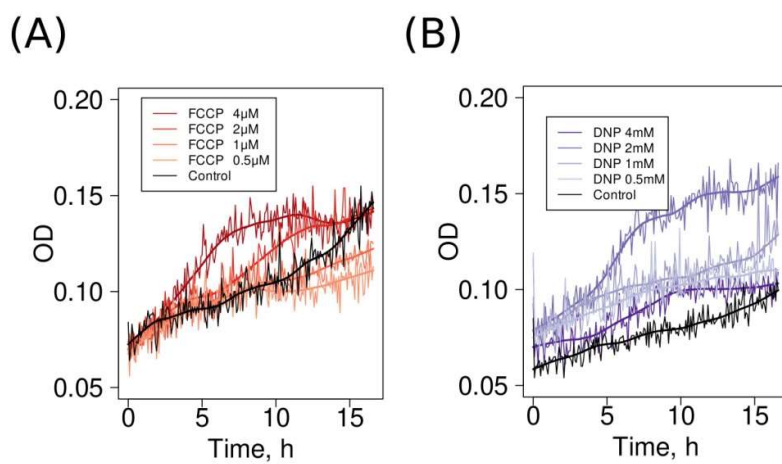

Figure S2. The effects of FCCP (A) and DNP (B) on the growth of *tps1-delta* cells in the glucose-containing YP ethanol medium.

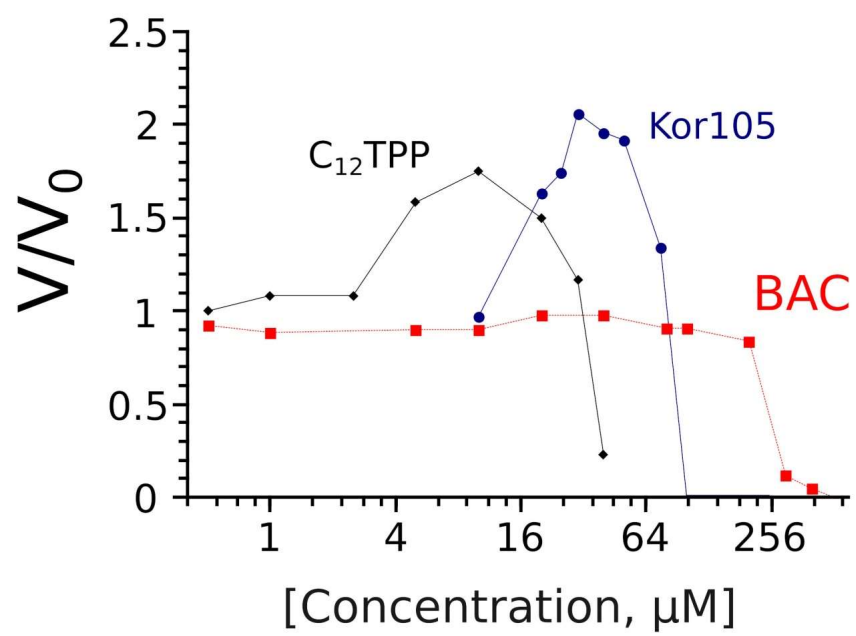

Figure S3. The effects of the lipophilic cations on the respiration rates of isolated mitochondria
